# Supplementary material
Source: Springer Nature journal article supplement (https://www.springermedizin.de/resource/supplementary/13054_2010_8685_MOESM6_ESM.pdf/9732786)

□ Placebo    ■ AMPD1    ■ Caffeine

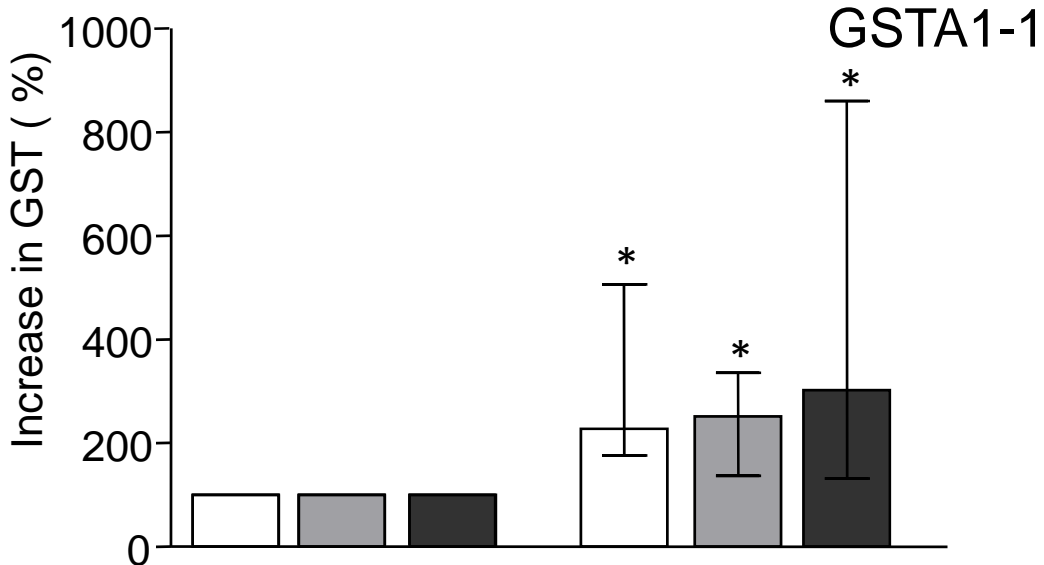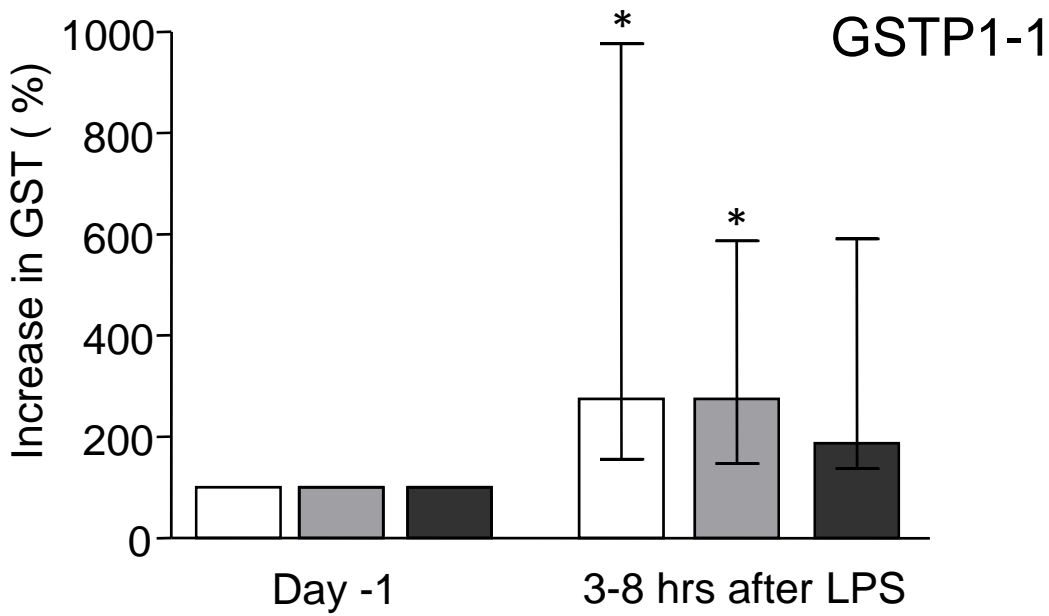

Supplement: MOESM6 [file 9732786]
